# Supplementary material for: Longitudinal Trajectories of Perceived Stress During College Transition Among First-Generation Students: The Protective Roles of Psychological Resilience and Social Support
Source: Research Square preprint supplement (doi:10.21203/rs.3.rs-8407034/v1), 2026-01-20
Supplement: Supplementary file 1 [file 4a5b0afe4d5db8fd68f810ff.docx]

**Longitudinal Trajectories of Perceived Stress During College Transition Among First-Generation Students: The Protective Roles of Psychological Resilience and Social Support**

Jing Han, Meijing Chen, Xiaoyi Wu, Mingjun Xie, Yu BU, Qinglin XU, Danhua Lin

**Supplemental materials**

**Table S1**

| Variables | First-generation college student  (*n* = 1548) | Continuing-generation college student  (*n* =778) | *F* or *χ2* | *p-*value |
| --- | --- | --- | --- | --- |
| Girls (%) | 45.2% | 42.8% | 5.22 | 0.013 |
| Province (*n* (%)) |  |  | 49.84 | <0.001 |
| Jiangsu | 383 (43.0%) a | 55 (33.2%) b |  |  |
| Beijing | 1165 (28.9%) a | 723 (18.3%) b |  |  |
| Age (*M* (*SD*)) | 18.13(0.78) | 18.16(1.28) | 296.27 | <0.001 |
| SSS (*M* (*SD*)) | 9.46(2.64) | 11.19(2.37) | 179.84 | <0.001 |
| PR (*M* (*SD*)) | 47(10.72) | 48.1(10.94) | 105.35 | <0.001 |
| SS (*M* (*SD*)) | 19.19(6.09) | 20.57(6.13) | 25.89 | <0.001 |

*Sample Characteristics of First-generation and Continuing-generation college students(N = 2326)*

*Note.* SSS = subjective socioeconomic status, PR = Psychological resilience, SS = Social Support;

Proportion with different subscripts were significantly different from each other within a raw (*p* < .05).

Table S1 suggested that demographic differences exist between first-generation and continuing-generation college students, which aligns with the broader socioeconomic patterns in China. First, a higher proportion of girls were observed among first-generation students (45.2%) compared to continuing-generation students (42.8%), χ² = 5.22, p = 0.013. This pattern is consistent with national demographic trends, where rural populations show a more balanced gender ratio (1.03) compared to urban populations (1.08) according to the China Statistical Yearbook (2021). Second, significant regional distribution differences were found, χ² = 49.84, p < 0.001. First-generation students were overrepresented in Jiangsu province (43.0% vs. 33.2%), while continuing-generation students were more concentrated in Beijing (18.3% vs. 28.9%). This geographical pattern reflects the urban-rural composition of these regions, with Jiangsu having a larger rural population base. Third, although the mean age difference was statistically significant (F = 296.27, p < 0.001), the actual difference was minimal (first-generation: M = 18.13, SD = 0.78; continuing-generation: M = 18.16, SD = 1.28). This slight variation may be attributed to educational policy implementations in rural areas, where the Compulsory Education Law allows for delayed school entry and grade retention in regions with limited educational resources. Fourth, first-generation students reported significantly lower subjective socioeconomic status (SSS: M = 9.46, SD = 2.64) compared to continuing-generation students (M = 11.19, SD = 2.37), F = 179.84, p < 0.001. This disparity mirrors the substantial urban-rural income gap documented in the China Statistical Yearbook (2021), which shows urban residents' disposable income was approximately 2.7 times that of rural residents from 2017-2020. Finally, first-generation students demonstrated lower levels of both psychological resilience (PR: M = 47.0, SD = 10.72 vs. M = 48.1, SD = 10.94; F = 105.35, p < 0.001) and social support (SS: M = 19.19, SD = 6.09 vs. M = 20.57, SD = 6.13; F = 25.89, p < 0.001), consistent with typically reduced parental academic involvement and future orientation resources available in rural environments.

**Alternate model analyses**

Although both latent class growth analysis (LCGA) and growth mixture modeling (GMM) are widely used longitudinal mixture techniques (Herle et al., 2020), LCGA was selected for the current study based on comparative model evaluation. While GMM allows for within-class variation, its increased complexity can lead to convergence problems and overfitting, particularly with smaller class sizes (Pennoni & Romeo, 2017; van der Nest et al., 2020).To empirically justify this choice, we compared LCGA against GMM specifications, including a GMM with only slope variances fixed to zero (GMM1). As shown in Table S5, the GMM1 solutions demonstrated several limitations: the 4- and 5-class solutions contained very small classes (each comprising only 4.39%-4.47% of the sample), falling below the recommended 5% threshold for class stability (Jung & Wickrama, 2008; Nylund et al., 2007). Additionally, entropy values for the 2- and 3-class solutions were suboptimal (.52 and .54, respectively), indicating inadequate class separation. A fully unrestricted GMM (GMM2) further failed to achieve convergence for the 3- to 5-class solutions.Although the 4-class GMM1 solution showed improved entropy (.67) and significant LMR-LRT p-values, its smallest class size (4.47%) remained below the recommended standard. By contrast, the more parsimonious LCGA approach provided conceptually clear and empirically stable class solutions that adequately balanced model fit with interpretability, making it more suitable for the data patterns observed in this study.

**Table S2**

*Model fit statistics for GMM1 results (N = 2326)*

| Classes | AIC | BIC | Adj-BIC | Entropy | Adj-LMR-LRT (*p* value) | SC N (%) |
| --- | --- | --- | --- | --- | --- | --- |
| 2 | 57397.142 | 57512.18 | 57448.64 | .52 | <.001 | 961(41.32%) |
| 3 | 57189.326 | 57344.63 | 57258.84 | .54 | <.001 | 635(27.3%) |
| 4 | 57093.266 | 57288.83 | 57180.81 | .67 | 0.01 | 104(4.47%) |
| 5 | 57031.877 | 57267.71 | 57137.44 | .69 | 0.02 | 102(4.39%) |

*Note.* AIC = Akaike information criterion, BIC = Bayesian information criterion, Adj-BIC = sample-size adjusted Bayesian information criterion, Adj-LMR-LRT = Adjusted Lo-Mendell-Rubin Likelihood Test, SC = smallest class size.

**Table S3**

*Model fit statistics for GMM2 results (N = 2326)*

| Classes | AIC | BIC | Adj-BIC | Entropy | Adj-LMR-LRT (*p* value) | SC N (%) |
| --- | --- | --- | --- | --- | --- | --- |
| 2 | 57429.66 | 57515.94 | 57468.28 | .53 | .005 | 914(48.7%) |
| 3 | Failed to converge | | | | | |
| 4 | Failed to converge | | | | | |
| 5 | Failed to converge | | | | | |

*Note.* AIC = Akaike information criterion, BIC = Bayesian information criterion, Adj-BIC = sample-size adjusted Bayesian information criterion, Adj-LMR-LRT = Adjusted Lo-Mendell-Rubin Likelihood Test, SC = smallest class size.

**References**

Herle, M., Micali, N., Abdulkadir, M., Loos, R., Bryant-Waugh, R., Hübel, C., Bulik, C. M., & De Stavola, B. L. (2020). Identifying typical trajectories in longitudinal data: modelling strategies and interpretations. *European Journal of Epidemiology*, *35*(3), 205-222. <https://doi.org/10.1007/s10654-020-00615-6>

Jung, T., & Wickrama, K. A. S. (2008). An Introduction to Latent Class Growth Analysis and Growth Mixture Modeling. *Social and Personality Psychology Compass*, *2*(1), 302-317. <https://doi.org/https://doi.org/10.1111/j.1751-9004.2007.00054.x>

Nylund, K. L., Asparouhov, T., & Muthén, B. O. (2007). Deciding on the Number of Classes in Latent Class Analysis and Growth Mixture Modeling: A Monte Carlo Simulation Study. *Structural Equation Modeling: A Multidisciplinary Journal*, *14*(4), 535-569. <https://doi.org/10.1080/10705510701575396>

Pennoni, F., & Romeo, I. (2017). Latent Markov and growth mixture models for ordinal individual responses with covariates: A comparison. *Statistical Analysis and Data Mining: The ASA Data Science Journal*, *10*(1), 29-39. <https://doi.org/https://doi.org/10.1002/sam.11335>

van der Nest, G., Lima Passos, V., Candel, M. J. J. M., & van Breukelen, G. J. P. (2020). An overview of mixture modelling for latent evolutions in longitudinal data: Modelling approaches, fit statistics and software. *Advances in Life Course Research*, *43*, 100323. <https://doi.org/https://doi.org/10.1016/j.alcr.2019.100323>
